# Supplementary material
Source: ML conference proceedings conference paper supplement (https://proceedings.mlr.press/v157/lu21a.html)
Supplement: Supplementary file [file lu21a-supp.pdf]

## Supplementary Materials

| Continuous Covariates           | Traditional Values and Government intervention | Economical Liberalism | Green | Pre-global and Less regulations | Euroseptic |
|---------------------------------|------------------------------------------------|-----------------------|-------|---------------------------------|------------|
| Climate is worth the cost       | -0.72                                          | -0.27                 | 2.50  | 2.47                            | -3.84      |
| Keep petrol cars                | 1.79                                           | 0.19                  | -3.96 | 0.31                            | 1.95       |
| Discourage eating meat          | -1.86                                          | -0.22                 | 3.68  | 0.31                            | -2.12      |
| Reduce tree cutting             | -1.65                                          | -1.33                 | 3.92  | -0.55                           | -0.81      |
| Avoid raising taxes             | -1.52                                          | 2.34                  | -3.54 | 1.80                            | 1.39       |
| Toward UBI system               | -1.92                                          | -2.91                 | 3.17  | 0.56                            | 0.65       |
| Leave eurozone                  | 0.77                                           | -1.52                 | -0.10 | -3.80                           | 4.11       |
| Keep health services public     | 3.30                                           | -5.54                 | 1.88  | -1.21                           | 0.95       |
| Privatize elderly care          | -2.89                                          | 4.42                  | -1.97 | 1.99                            | -0.95      |
| Legalize euthanasia             | -4.13                                          | -2.54                 | 1.56  | 2.74                            | 2.12       |
| Allow gender affirming < 18     | -2.43                                          | -1.59                 | 3.41  | 1.39                            | -1.03      |
| Groceries can sell liquor       | -4.08                                          | -1.26                 | -1.63 | 4.47                            | 2.68       |
| Ban energy drink < 15           | 3.70                                           | 0.12                  | -0.38 | -1.65                           | -1.75      |
| Reduce snuff import             | 3.59                                           | 2.00                  | 0.40  | -2.52                           | -3.36      |
| Equalize parental leaves        | -1.06                                          | -3.07                 | 2.18  | 3.13                            | -1.30      |
| Extend compulsory education     | 2.08                                           | -2.88                 | 1.82  | 0.61                            | -1.82      |
| Delay summer vacation           | -0.40                                          | -0.61                 | -0.61 | 2.76                            | -0.91      |
| Have less universities          | -3.21                                          | 3.56                  | -0.75 | 0.79                            | -0.06      |
| Immigrants cause insecurity     | 1.39                                           | 1.02                  | -3.61 | -0.93                           | 2.32       |
| More work-based immigrants      | -1.69                                          | 1.56                  | 0.92  | 3.22                            | -3.61      |
| Join NATO                       | -3.49                                          | 3.82                  | -1.83 | 3.06                            | -0.94      |
| Criminalize hate speech         | 1.84                                           | -0.78                 | 1.06  | 2.59                            | -4.44      |
| Need traditional values         | 3.17                                           | 0.80                  | -3.86 | -0.59                           | 0.78       |
| Defend law and order            | 1.29                                           | -0.10                 | -3.06 | -0.20                           | 2.21       |
| Inequality is right             | -2.46                                          | 3.01                  | -1.81 | 0.17                            | 1.35       |
| More freedom and responsibility | -4.17                                          | -0.15                 | -1.26 | 2.89                            | 2.82       |
| Serve your own voters           | 1.86                                           | -4.00                 | -2.19 | 2.37                            | 1.95       |
| Higher goals > self interest    | 0.14                                           | 2.00                  | 0.38  | -1.68                           | -0.82      |
| Strive not to offend            | 2.87                                           | -1.49                 | 0.02  | 1.95                            | -3.15      |

Table 1: Factorial structure of covariates in the Yle Election Compass dataset, found by the CFTM model. Rows are continuous covariates, columns ‘Traditional Values and Government Intervention’-‘Euroseptic’ are factors, factor names given by analysis of the values. Positive/negative number means increasing the loading of the factor will increase/decrease value of the covariate.

| Continuous<br>Covariates<br>Covariates | Social<br>Perfector<br>and Creator | Achiever<br>and<br>Trader | Doom<br>-focused<br>Player | Reviewer | Game<br>Collector | Entertainer | Infrequent<br>Player |
|----------------------------------------|------------------------------------|---------------------------|----------------------------|----------|-------------------|-------------|----------------------|
| Total playtime                         | -1.11                              | 3.16                      | 6.45                       | -3.90    | 1.33              | 1.45        | -7.04                |
| Playtime in<br>2 weeks                 | -1.21                              | 2.91                      | 6.33                       | -3.66    | 1.07              | 0.73        | -5.99                |
| Votes up                               | 3.37                               | -1.40                     | -0.73                      | -1.05    | -0.95             | 2.89        | -1.57                |
| Votes funny                            | 2.55                               | -1.38                     | -0.94                      | -0.84    | -1.03             | 3.44        | -1.20                |
| Games Owned                            | -0.78                              | -2.41                     | -3.28                      | -0.84    | 6.54              | 1.28        | -0.57                |
| DLC owned                              | -0.22                              | -3.22                     | -3.62                      | 1.93     | 5.44              | 1.52        | -1.54                |
| Reviews                                | 1.45                               | -0.76                     | -0.93                      | 4.11     | 1.50              | -2.22       | -2.84                |
| Level                                  | 2.82                               | 1.59                      | -4.75                      | 1.99     | 3.78              | -1.06       | -3.83                |
| Badges                                 | 2.61                               | 1.42                      | -3.17                      | 1.40     | 3.75              | -2.83       | -3.01                |
| Screenshots                            | 0.22                               | 0.20                      | 1.25                       | 6.71     | 0.36              | -1.84       | -6.13                |
| Groups                                 | 2.39                               | 5.33                      | -2.30                      | -0.56    | 0.43              | -1.74       | -3.19                |
| Friends                                | 4.10                               | 0.29                      | -2.60                      | 2.45     | -0.48             | 2.42        | -5.00                |
| Hours played                           | 1.66                               | -2.09                     | -1.71                      | -0.79    | 0.44              | 6.64        | -3.10                |
| Videos                                 | 0.61                               | -0.21                     | 2.02                       | 0.47     | 0.93              | -1.02       | -2.71                |
| Achievements                           | -2.49                              | 4.99                      | -4.47                      | 0.34     | -0.63             | 2.93        | -0.11                |
| Perfect Games                          | 4.77                               | 2.37                      | -2.22                      | -1.12    | 0.83              | -3.38       | -1.30                |
| Completion rate                        | 1.69                               | 5.26                      | -6.55                      | 1.37     | 1.51              | -0.49       | -2.19                |
| Games                                  | -0.07                              | 0.41                      | -2.13                      | -2.18    | 5.94              | -1.07       | -1.17                |
| Workshop items                         | 6.80                               | -1.69                     | 0.94                       | -2.00    | -0.38             | -2.98       | -0.86                |
| Wishlisted                             | -0.96                              | -1.09                     | -0.96                      | -0.93    | 6.10              | -2.47       | -0.25                |
| Items owned                            | -1.79                              | -0.63                     | 0.31                       | 7.87     | 1.11              | -2.99       | -3.51                |
| Trades made                            | -1.46                              | 2.72                      | -0.96                      | 1.73     | 0.60              | -1.54       | -1.05                |
| Market<br>transactions                 | -1.82                              | 7.93                      | -2.18                      | -0.45    | -0.01             | -2.13       | -1.30                |

Table 2: Factorial structure of covariates in the Doom Eternal Game Reviews dataset, found by the CFTM model. Rows are covariates, columns ‘Social Perfector and Creator’- ‘Infrequent Player’ are factors.

| Model         | K  | Data        |              |                |
|---------------|----|-------------|--------------|----------------|
|               |    | Yle Compass | Doom Eternal | Lounge Reviews |
| CFTM (L = 5)  | 5  | -7.14       | -6.60        | -6.59          |
|               | 10 | -7.14       | -6.60        | -6.59          |
|               | 15 | -7.14       | -6.60        | -6.59          |
|               | 20 | -7.14       | -6.60        | -6.59          |
| CFTM (L = 10) | 5  | -7.14       | -6.60        | -7.52          |
|               | 10 | -7.14       | -6.60        | -7.52          |
|               | 15 | -7.14       | -6.61        | -7.52          |
|               | 20 | -7.14       | -6.61        | -7.52          |
| LDA           | 5  | -7.14       | -6.63        | -7.52          |
|               | 10 | -7.14       | -6.63        | -7.52          |
|               | 15 | -7.14       | -6.63        | -7.52          |
|               | 20 | -7.14       | -6.63        | -7.52          |
| MetaLDA       | 5  | -8.24       | -7.77        | -7.87          |
|               | 10 | -8.24       | -7.77        | -7.87          |
|               | 15 | -8.24       | -7.77        | -7.87          |
|               | 20 | -8.24       | -7.77        | -7.87          |
| SCHOLAR       | 5  | -7.22       | -6.76        | -6.63          |
|               | 10 | -7.23       | -6.76        | -6.63          |
|               | 15 | -7.24       | -6.76        | -6.63          |
|               | 20 | -7.24       | -6.76        | -6.63          |
| STM           | 5  | -9.40       | -9.04        | -9.43          |
|               | 10 | -9.48       | -9.25        | -9.82          |
|               | 15 | -9.57       | -9.48        | -10.12         |
|               | 20 | -9.68       | -9.65        | -10.38         |
| CTPF          | 5  | -12.43      | -11.52       | -12.81         |
|               | 10 | -11.03      | -9.99        | -10.28         |
|               | 15 | -10.27      | -9.39        | -9.00          |
|               | 20 | -9.69       | -9.14        | -8.14          |

Table 3: Details for quantitative evaluation (full data set).

| Model         | K  | Data        |              |                |
|---------------|----|-------------|--------------|----------------|
|               |    | Yle Compass | Doom Eternal | Lounge Reviews |
| CFTM (L = 5)  | 5  | -7.19       | -6.62        | -6.68          |
|               | 10 | -7.19       | -6.63        | -6.71          |
|               | 15 | -7.18       | -6.65        | -6.72          |
|               | 20 | -7.18       | -6.67        | -6.74          |
| CFTM (L = 10) | 5  | -7.19       | -6.63        | -6.71          |
|               | 10 | -7.19       | -6.64        | -6.79          |
|               | 15 | -7.19       | -6.66        | -6.82          |
|               | 20 | -7.19       | -6.69        | -6.84          |
| LDA           | 5  | -7.28       | -7.24        | -10.59         |
|               | 10 | -7.28       | -7.34        | -10.89         |
|               | 15 | -7.28       | -7.44        | -10.89         |
|               | 20 | -7.28       | -7.76        | -10.89         |
| MetaLDA       | 5  | -8.23       | -7.72        | -7.63          |
|               | 10 | -8.23       | -7.73        | -7.63          |
|               | 15 | -8.23       | -7.72        | -7.63          |
|               | 20 | -8.23       | -7.73        | -7.63          |
| SCHOLAR       | 5  | -7.57       | -6.83        | -6.73          |
|               | 10 | -7.58       | -6.82        | -6.73          |
|               | 15 | -7.59       | -6.83        | -6.73          |
|               | 20 | -7.57       | -6.83        | -6.73          |
| STM           | 5  | -9.83       | -9.37        | -6.73          |
|               | 10 | -10.43      | -9.88        | -6.73          |
|               | 15 | -10.92      | -10.16       | -6.73          |
|               | 20 | -11.30      | -10.64       | -6.73          |
| CTPF          | 5  | -11.98      | -11.18       | -11.26         |
|               | 10 | -10.18      | -9.17        | -9.24          |
|               | 15 | -9.19       | -7.60        | -8.44          |
|               | 20 | -8.37       | -6.84        | -7.93          |

Table 4: Details for quantitative evaluation (500 random samples).
